# Supplementary material
Source: publisher figshare collection journal article supplement (https://acs.figshare.com/ndownloader/files/4174294)
Supplement: Supplementary file 1 [file 4174294]

## Supporting Information

### The effects of crystal structure and electronic structure on photocatalytic H<sub>2</sub> evolution and CO<sub>2</sub> reduction over two phases of perovskite-structured NaNbO<sub>3</sub>

#### Authors:

Peng Li <sup>1, 2, 3</sup>, Shuxin Ouyang <sup>2</sup>, Guangcheng Xi <sup>2</sup>, Tetsuya Kako <sup>1, 2</sup>, and Jinhua Ye <sup>1, 2, 3, 4, \*</sup>

<sup>1</sup> Department of Chemistry, Graduate School of Science, Hokkaido University, Sapporo, Japan

<sup>2</sup> Environmental Remediation Materials Unit, National Institute for Materials Science (NIMS), 1-2-1 Sengen, Tsukuba, Ibaraki 305-0047, Japan  
NIMS

<sup>3</sup> International Center for Materials Nanoarchitectonics (WPI-MANA), National Institute for Materials Science (NIMS), 1-2-1 Sengen, Tsukuba, Ibaraki, Japan

<sup>4</sup> TU-NIMS Joint Research Center, School of Materials Science and Engineering, Tianjin University, 92 Weijin Road, Nankai District, Tiajin, P. R. China

(Received

\* Author to whom correspondence should be addressed.

Electronic mail: [jinhua.ye@nims.go.jp](mailto:jinhua.ye@nims.go.jp).

## SI-1 The catalysts characterizations before and after H<sub>2</sub> evolution and CO<sub>2</sub> reduction

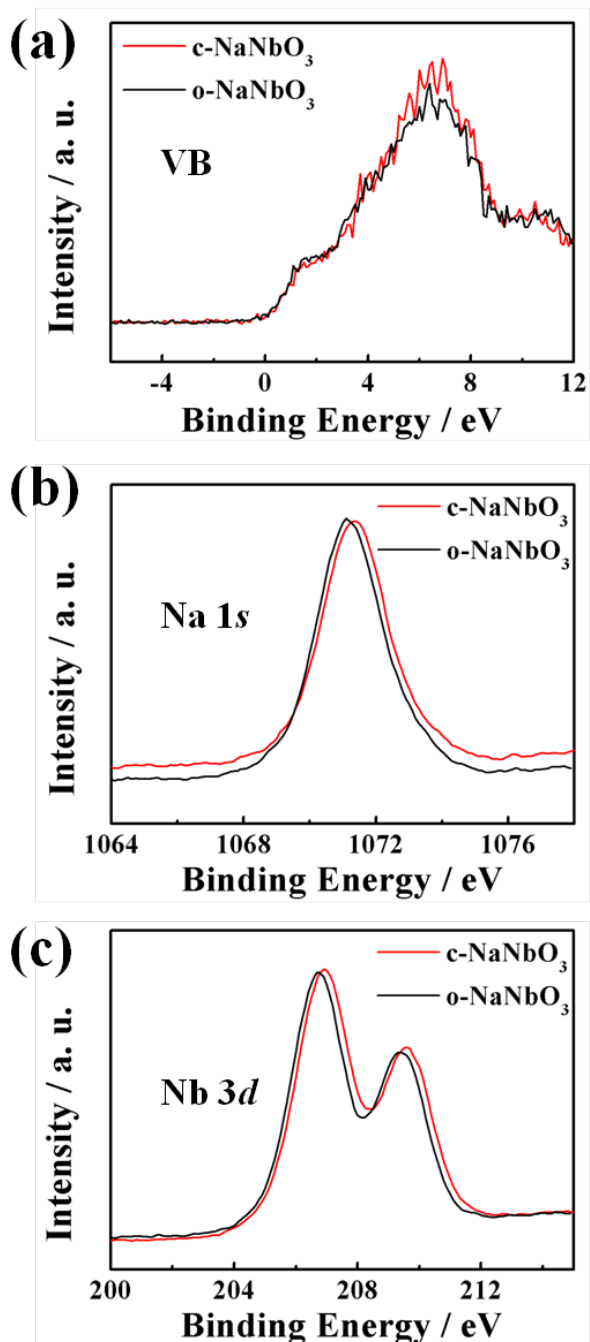

Figure S1. The XPS spectra of the as-prepared NaNbO<sub>3</sub> samples. (a) Valence bands (VB) of c-NaNbO<sub>3</sub> and o-NaNbO<sub>3</sub>. (b) Na 1s of c-NaNbO<sub>3</sub> and o-NaNbO<sub>3</sub>. (c) Nb 3d of c-NaNbO<sub>3</sub> and o-NaNbO<sub>3</sub>.

The XPS spectra results in Figure S1 indicate the valence band, Na 1s and Nb 3d energy levels of c-NaNbO<sub>3</sub> and o-NaNbO<sub>3</sub>. In Figure S1(a), the same valence band energy level suggests that the valence band tops have the same energy which is also proved by the theoretical calculation. In Figure S1(b) and S1(c), the energy levels of Na 1s and Nb 3d electrons increase 0.3 eV and 0.2 eV respectively from c-NaNbO<sub>3</sub> to o-NaNbO<sub>3</sub>. This phenomenon indicates that the electronic structures of two NaNbO<sub>3</sub> samples are different, and the theoretical energy levels of Na 1s and Nb 3d orbitals (supplied in Figure S3) lend support to such difference between cubic and orthorhombic NaNbO<sub>3</sub>.

## SI-2 The catalysts characterizations before and after H<sub>2</sub> evolution and CO<sub>2</sub> reduction

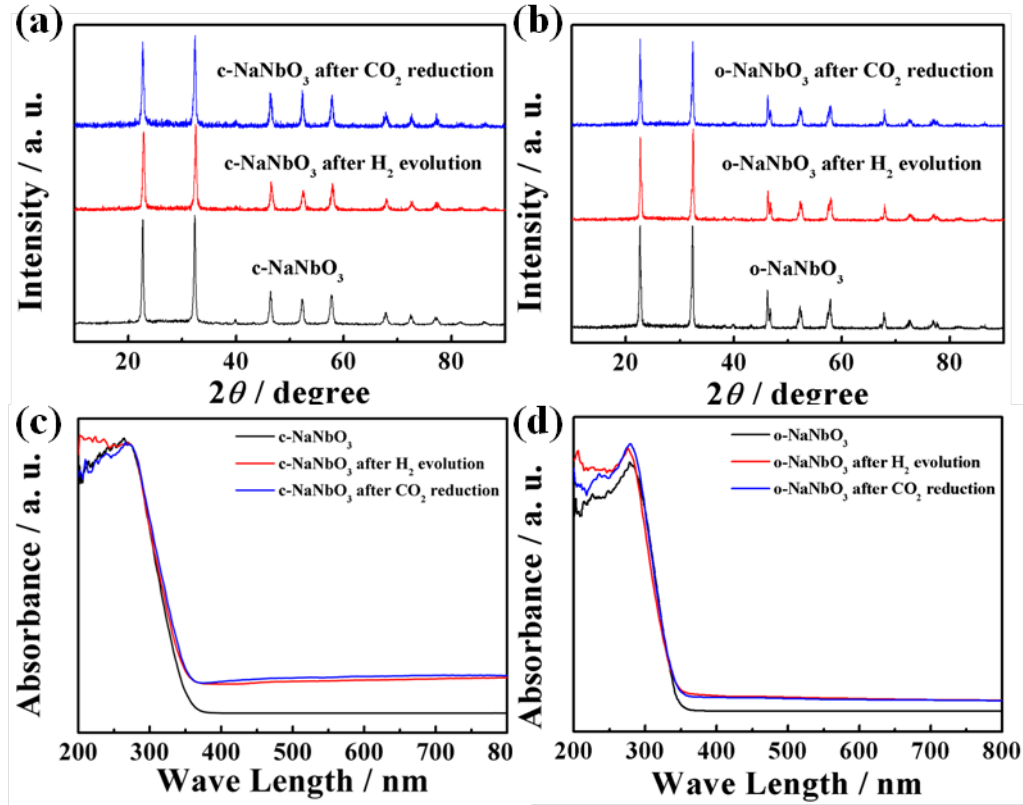

**Figure S2.** (a) XRD patterns of original c-NaNbO<sub>3</sub> and c-NaNbO<sub>3</sub> after H<sub>2</sub> evolution and CO<sub>2</sub> reduction. (b) XRD patterns of original o-NaNbO<sub>3</sub> and o-NaNbO<sub>3</sub> after H<sub>2</sub> evolution and CO<sub>2</sub> reduction. (c) UV-visible absorption spectra of original c-NaNbO<sub>3</sub> and c-NaNbO<sub>3</sub> after H<sub>2</sub> evolution and CO<sub>2</sub> reduction. (d) UV-visible absorption spectra of original o-NaNbO<sub>3</sub> and o-NaNbO<sub>3</sub> after H<sub>2</sub> evolution and CO<sub>2</sub> reduction.

### SI-3 Partial density of states (PDOS) of Nb 3d and Na 1s orbitals

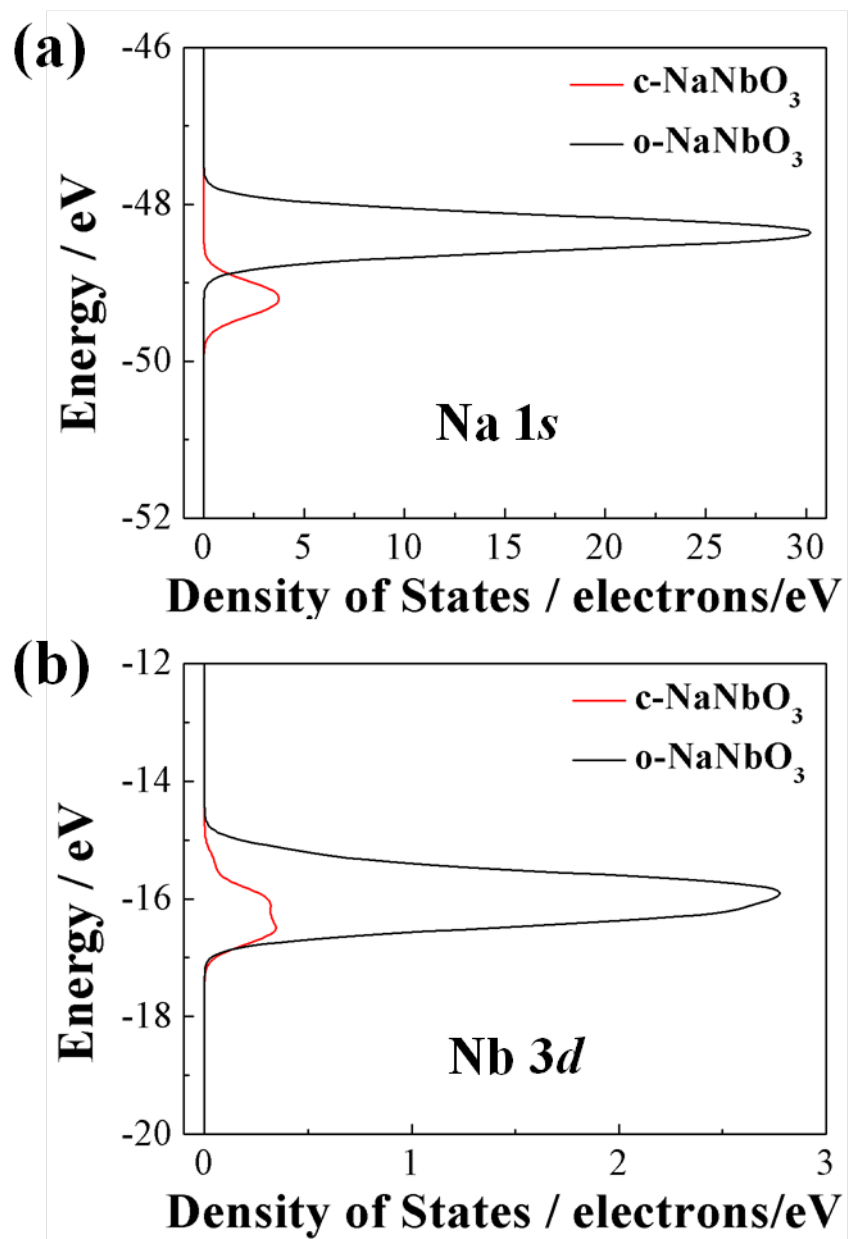

**Figure S3.** (a) PDOS of Na 1s orbital. (b) PDOS of Nb 3d orbital.
